# Supplementary material for: The ubiquity and ancestry of insect doublesex
Source: PubMed Central journal article supplement (PMC4538375; doi:10.1038/srep13068), 2015-08-17
Supplement: srep13068-s1.pdf [file srep13068-s1.pdf]

1  
2  
3  
4  
5  
6  
7  
8  
9  
10  
11  
12  
13  
14  
15  
16  
17  
18  
19  
20  
21  
22

**Supplementary Information:**  
**The ubiquity and ancestry of insect *doublesex***

Dana C. Price<sup>1,\*</sup> Andrea Egizi<sup>1,2</sup> and Dina M. Fonseca<sup>1</sup>

<sup>1</sup> – Rutgers University, Department of Entomology, New Brunswick, NJ, USA

<sup>2</sup> – Graduate Program in Ecology and Evolution, Rutgers University, New Brunswick, NJ,  
USA

\* To whom correspondence should be addressed:

178 Jones Avenue

New Brunswick, NJ 08901 USA

d.price@rutgers.edu

Figure S1

| Order                  | Species                          | GenBank accession                | OD1 sequence                                     | OD2 Sequence                                                       |
|------------------------|----------------------------------|----------------------------------|--------------------------------------------------|--------------------------------------------------------------------|
| Protura                | <i>Acerentomon</i> sp. AD2013    | GAXE01026579_4                   | TTPLCAQRNHLGKILKLGKHKRYCRYRCCI-CQECIATKARQIKMAQ  | DASLVFYQMEHIMQKFLPIESLPAIYALFKDANGSVEE-TCCKLMSAYEDLHELHSLVRLLEAL   |
| Protura                | <i>Acerentomon</i> sp. AD2013    | GAXE01016537_1                   | <OD2 singleton>                                  | AATLIFQORLEHLLNFKLPVLESIPAIYALFKDANGSVEE-ASERLMAAYEELHELHSLVRLLEAL |
| Zygentoma              | <i>Atelura formicaria</i>        | GAYJ01004010_4                   | PARLCAQRNHLGKILKLGKHKRYCRYRCCI-CQECIATKARQIKMAQ  | ARERMLYESLVMRQAFVFGVEAMPPLLLCLLKHRS-SVQE-ASLKIYQGHYDNLAKGFGVLDG    |
| Zygentoma              | <i>Atelura formicaria</i>        | PCDORPKIACXX:7:2202:17946:4233:6 | <OD2 singleton>                                  | -----KESLQTLDDMFLRPMETPLIYVVLKDKAR-SDVKEASNRITEGGWIMTQMAA          |
| Zygentoma              | <i>Tricholepidion gertschi</i>   | GASO01035612_2                   | PSRLCAQRNHLGKILKLGKHKRYCRYRCCI-CQECIATKARQIKMAQ  | EREQMLYESLVMRQAFVFGVEAMPPLLLCLLKHRS-SVQE-ASWKIQCTDRLSARGIIGIEN     |
| Zygentoma              | <i>Tricholepidion gertschi</i>   | GASO01035827_5                   | <OD2 singleton>                                  | EGDVMMSELHALLMFLPLETEPLIYVVLKDKARS-DVKE-ASNRITIEQSELSITRF-----     |
| Zygentoma              | <i>Thermobia domestica</i>       | GASN01031735_3                   | PSRLCAQRNHLGKILKLGKHKRYCRYRCCI-CQECIATKARQIKMAQ  | ARERMLYESLVMRQAFVFGVEAMPPLLLCLLKHRS-SVQE-ASWKIYQCTDRLSARGIIGIEN    |
| Zygentoma              | <i>Thermobia domestica</i>       | GASN010345779_5                  | <OD2 singleton>                                  | ENVELLKDLSHALLDMFLPLETEPLIYVVLKDKARS-DVKE-ASNRIMEDQVQDQDMLRAGIIPAG |
| Odonata                | <i>Epiophlebia superstes</i>     | GAVW01013444_6                   | TPPKCARCRNHLKILKLGKHKRYCRYRCCI-CQECIATKARQIKMAQ  | TRERMLYESLVMRQAFVFGVEAMPPLLLCLLKHRS-SVQE-ASWKIYQCTDRLSARGIIGIEN    |
| Odonata                | <i>Cordulegaster boltonii</i>    | GAYO01000812_6                   | TPPKCARCRNHLKILKLGKHKRYCRYRCCI-CQECIATKARQIKMAQ  | ENMDFIKDAIVALLQMFRLPVDITPLIYVVLKDKARS-DVKE-ASNOIQDQDMLRAGIIPAG     |
| Ephemeroptera          | <i>Ephemerella danica</i>        | GAYO01006643_5                   | SNRLCAQRNHLGKILKLGKHKRYCRYRCCI-CQECIATKARQIKMAQ  | TRERMLYESLVMRQAFVFGVEAMPPLLLCLLKHRS-SVQE-ASWKIYQCTDRLSARGIIGIEN    |
| Ephemeroptera          | <i>Isonychia bicolor</i>         | GAXA00111429_5                   | SNRLCAQRNHLGKILKLGKHKRYCRYRCCI-CQECIATKARQIKMAQ  | TRERMLYESLVMRQAFVFGVEAMPPLLLCLLKHRS-SVQE-ASWKIYQCTDRLSARGIIGIEN    |
| Ephemeroptera          | <i>Isonychia bicolor</i>         | GAXA01058460_2                   | <OD2 singleton>                                  | DNISLRDSIQTLDDTFLRPMETPLIYVVLKDKARS-DVKE-ASNRITIEQSELSITRF-----    |
| Ephemeroptera          | <i>Baetis</i> sp. AD-2013        | GAYU01002143_4                   | SNRMCAQRNHLGKILKLGKHKRYCRYRCCI-CQECIATKARQIKMAQ  | QRKMLMYSLELRSRHPVFDALPPLLLCLLKHRS-SVQE-ASWKIQGLQGLSALAAASNREL      |
| Zoraptera              | <i>Zorotypus caudelli</i>        | GAYO01001439_2                   | RTFKGCRNRNGALNVLKLGKHKRYCRYRCCI-CQECIATKARQIKMAQ | DKTRVLIQINCLRSYGLFVSWESPLVHILLEDGMVNYA-SSVYFNALQGLQGLSALAAASNREL   |
| Zoraptera              | <i>Zorotypus caudelli</i>        | GAYO01001439_2                   | RTFKGCRNRNGALNVLKLGKHKRYCRYRCCI-CQECIATKARQIKMAQ | DKTRVLIQINCLRSYGLFVSWESPLVHILLEDGMVNYA-SSVYFNALQGLQGLSALAAASNREL   |
| Zoraptera              | <i>Zorotypus caudelli</i>        | GAYO01001439_2                   | RTFKGCRNRNGALNVLKLGKHKRYCRYRCCI-CQECIATKARQIKMAQ | DKTRVLIQINCLRSYGLFVSWESPLVHILLEDGMVNYA-SSVYFNALQGLQGLSALAAASNREL   |
| Zoraptera              | <i>Zorotypus gurneyi</i>         | GAYO01001439_2                   | RTFKGCRNRNGALNVLKLGKHKRYCRYRCCI-CQECIATKARQIKMAQ | DKTRVLIQINCLRSYGLFVSWESPLVHILLEDGMVNYA-SSVYFNALQGLQGLSALAAASNREL   |
| Zoraptera              | <i>Zorotypus gurneyi</i>         | GAYO01001439_2                   | RTFKGCRNRNGALNVLKLGKHKRYCRYRCCI-CQECIATKARQIKMAQ | DKTRVLIQINCLRSYGLFVSWESPLVHILLEDGMVNYA-SSVYFNALQGLQGLSALAAASNREL   |
| Dermoptera             | <i>Apachys chartaceus</i>        | GAWU00111999_3                   | -----YRNCR-NKCTLTAERQIRVALH                      | KIKIQRHESITHTMTEFLKPSKSVLITLTKLRYINN-VSHHITDSTOELIIGNHEOSQ         |
| Dermoptera             | <i>Forficula auricularia</i>     | GAYO010017360_5                  | KAPNCARCRNHLKILKLGKHKRYCRYRCCI-CQECIATKARQIKMAQ  | ANGVLDLRSISVITNFKPLTLEAVPMIYALLKSAHFSVHQ-VLENIENCKIPYCVKLNIVVIT    |
| Orthoptera             | <i>Tetrix subulata</i>           | GASO01124537_1                   | TPPNCARCRNHLKILKLGKHKRYCRYRCCI-CQECIATKARQIKMAQ  | ENFVLESIQALLEFLYFVETPLIYVVLKDKARS-DVKE-ASNRILEAQEPTSCAGLNDAAR      |
| Orthoptera             | <i>Teleogryllus commodus</i>     | GHSB01043004_1                   | RTPYCAQRNHLGKILKLGKHKRYCRYRCCI-CQECIATKARQIKMAQ  | -----LPQIQMLLDAFLRPMALPILYVVLKDKARS-DVKE-ASNRILEAQEPTSCAGLNDAAR    |
| Phasmatodea            | <i>Arcteano asperimus</i>        | GAZQ001017692_2                  | MNRLCALCRNHLGKILKLGKHKRYCRYRCCI-CQECIATKARQIKMAQ | VRQMLYESLVMRQAFVFGVEAMPPLLLCLLKHRS-SVQE-ASWKIYQCTDRLSARGIIGIEN     |
| Phasmatodea            | <i>Arcteano asperimus</i>        | GAWC01030481_5                   | <OD2 singleton>                                  | VSVVAMDDGVYTLHMHFYHVMELPILLVVLSDAHDVTE-AYNRIQLQGLSALAAASNREL       |
| Phasmatodea            | <i>Ramulus artemis</i>           | GAWE01010273_2                   | TPPNCARCRNHLKILKLGKHKRYCRYRCCI-CQECIATKARQIKMAQ  | VSVVAMDDGVYTLHMHFYHVMELPILLVVLSDAHDVTE-AYNRIQLQGLSALAAASNREL       |
| Phasmatodea            | <i>Ramulus artemis</i>           | GAWE01010273_2                   | TPPNCARCRNHLKILKLGKHKRYCRYRCCI-CQECIATKARQIKMAQ  | VSVVAMDDGVYTLHMHFYHVMELPILLVVLSDAHDVTE-AYNRIQLQGLSALAAASNREL       |
| Phasmatodea            | <i>Medauroidea extradentata</i>  | GAWD01075183_3                   | MNRLCALCRNHLGKILKLGKHKRYCRYRCCI-CQECIATKARQIKMAQ | VRDQMLYESLVMRQAFVFGVEAMPPLLLCLLKHRS-SVQE-ASWKIYQCTDRLSARGIIGIEN    |
| Phasmatodea            | <i>Extatosoma tiaratum</i>       | GAWG01081702_1                   | INRLCALCRNHLGKILKLGKHKRYCRYRCCI-CQECIATKARQIKMAQ | VRQMLYESLVMRQAFVFGVEAMPPLLLCLLKHRS-SVQE-ASWKIYQCTDRLSARGIIGIEN     |
| Phasmatodea            | <i>Sipyliaidea siphylus</i>      | GAWF01025783_1                   | INRLCALCRNHLGKILKLGKHKRYCRYRCCI-CQECIATKARQIKMAQ | VRQMLYESLVMRQAFVFGVEAMPPLLLCLLKHRS-SVQE-ASWKIYQCTDRLSARGIIGIEN     |
| Phasmatodea            | <i>Peruphasma schultzei</i>      | GAWJ01240650_4                   | MNRLCALCRNHLGKILKLGKHKRYCRYRCCI-CQECIATKARQIKMAQ | VRQMLYESLVMRQAFVFGVEAMPPLLLCLLKHRS-SVQE-ASWKIYQCTDRLSARGIIGIEN     |
| Phasmatodea            | <i>Timema cristinale</i>         | GAVX01147206_3                   | MNRLCALCRNHLGKILKLGKHKRYCRYRCCI-CQECIATKARQIKMAQ | VRQMLYESLVMRQAFVFGVEAMPPLLLCLLKHRS-SVQE-ASWKIYQCTDRLSARGIIGIEN     |
| Mantodea               | <i>Metallyticus splendidus</i>   | GATB01322676_2                   | TPPNCARCRNHLKILKLGKHKRYCRYRCCI-CQECIATKARQIKMAQ  | ESMEIPWDAALTLLEKFLPVSPLIYVVLKDKARS-DVKE-ASNRILEAQEPTSCAGLNDAAR     |
| Mantodea               | <i>Mantis religiosa</i>          | GASW01222710_6                   | TPPNCARCRNHLKILKLGKHKRYCRYRCCI-CQECIATKARQIKMAQ  | ESITVRESILELLEFLRPLWETPLIYVVLKDKARS-DVKE-ASNRILEAQEPTSCAGLNDAAR    |
| Mantodea               | <i>Mantis religiosa</i>          | GASW01222710_6                   | TPPNCARCRNHLKILKLGKHKRYCRYRCCI-CQECIATKARQIKMAQ  | ESITVRESILELLEFLRPLWETPLIYVVLKDKARS-DVKE-ASNRILEAQEPTSCAGLNDAAR    |
| Hemiptera              | <i>Cercopis vulnerata</i>        | GAYO01115682_1                   | TPPNCARCRNHLKILKLGKHKRYCRYRCCI-CQECIATKARQIKMAQ  | ENSKPEWDSILLMHLGLPVNTPLILLILKEVADSVTE-VNCRFLQGEAELRSTCFKIEE        |
| Hemiptera              | <i>Okanagana villosa</i>         | GAWO01014169_1                   | TPPNCARCRNHLKILKLGKHKRYCRYRCCI-CQECIATKARQIKMAQ  | RDSKELWESILLHHLWFLPVNTPLILLILKEVADSVTE-VNCRFLQGEAELRSTCFKIEE       |
| Hemiptera              | <i>Okanagana villosa</i>         | GAWO01014168_1                   | TPPNCARCRNHLKILKLGKHKRYCRYRCCI-CQECIATKARQIKMAQ  | RDSKELWESILLHHLWFLPVNTPLILLILKEVADSVTE-VNCRFLQGEAELRSTCFKIEE       |
| Hemiptera              | <i>Notostira elongata</i>        | GASV01006917_3                   | KQRFQFCRNRHTKIRTKHGKHKRYCRYRCCI-CQECIATKARQIKMAQ | TLRIMWERTLTVLEKQYSLDTPILYVVLKDKARS-DVKE-ASNRILEAQEPTSCAGLNDAAR     |
| Hemiptera              | <i>Xenophysella greensladeae</i> | GAWR01023103_2                   | -APNCAQRNHLKILKLGKHKRYCRYRCCI-CQECIATKARQIKMAQ   | GEEVHWESIATLLEFLRPLWETPLIYVVLKDKARS-DVKE-ASNRILEAQEPTSCAGLNDAAR    |
| Psocoda (Phthiraptera) | <i>Menopon gallinae</i>          | GAWR01005396_5                   | TPPNCARCRNHLKILKLGKHKRYCRYRCCI-CQECIATKARQIKMAQ  | KSLNHRNCVMKLVKDFGLGIDAYPLAVYVFKIAGGVDYV-ATKMLIEQGEAELRSTCFKIEE     |
| Psocoda (Psocoptera)   | <i>Liposcelis bostrychophila</i> | GAYO01012131_4                   | TPPNCARCRNHLKILKLGKHKRYCRYRCCI-CQECIATKARQIKMAQ  | NKLNRYRYVMKLVKDFGLGIDAYPLAVYVFKIAGGVDYV-ATKMLIEQGEAELRSTCFKIEE     |
| Hymenoptera            | <i>Cotesia vestalis</i>          | GAYP01001251_3                   | TPPNCARCRNHLKILKLGKHKRYCRYRCCI-CQECIATKARQIKMAQ  | ENVEVLLECSKTLLEFLYFVETPLIYVVLKDKARS-DVKE-ASNRILEAQEPTSCAGLNDAAR    |
| Hymenoptera            | <i>Chrysid viridula</i>          | GAYT01010708_4                   | ALRSACRNSRHLKILKLGKHKRYCRYRCCI-CQECIATKARQIKMAQ  | DSVEVLLECSKTLLEFLYFVETPLIYVVLKDKARS-DVKE-ASNRILEAQEPTSCAGLNDAAR    |
| Hymenoptera            | <i>Orussus abietinus</i>         | GAYU01013146_6                   | GTCRCSRNLNEVMPKLGKHKRYCRYRCCI-CQECIATKARQIKMAQ   | ESMTDLQTLLELLEFLYFVETPLIYVVLKDKARS-DVKE-ASNRILEAQEPTSCAGLNDAAR     |
| Hymenoptera            | <i>Tenthredo koehleri</i>        | GAWW01003430_6                   | TPPNCARCRNHLKILKLGKHKRYCRYRCCI-CQECIATKARQIKMAQ  | ENVEVLLECSKTLLEFLYFVETPLIYVVLKDKARS-DVKE-ASNRILEAQEPTSCAGLNDAAR    |
| Hymenoptera            | <i>Microplitis demolitor</i>     | J0916215_4                       | TPPNCARCRNHLKILKLGKHKRYCRYRCCI-CQECIATKARQIKMAQ  | ENVEVLLECSKTLLEFLYFVETPLIYVVLKDKARS-DVKE-ASNRILEAQEPTSCAGLNDAAR    |
| Hymenoptera            | <i>Sphaerophthalma orestes</i>   | GAXP01022687_1                   | SRPSCARCRNHLKILKLGKHKRYCRYRCCI-CQECIATKARQIKMAQ  | GDVEVLLECSKTLLEFLYFVETPLIYVVLKDKARS-DVKE-ASNRILEAQEPTSCAGLNDAAR    |
| Hymenoptera            | <i>Sphaerophthalma orestes</i>   | GAXP01017427_3                   | RKPCACRNRHVKILKLGKHKRYCRYRCCI-CQECIATKARQIKMAQ   | DNVEVLLECSKTLLEFLYFVETPLIYVVLKDKARS-DVKE-ASNRILEAQEPTSCAGLNDAAR    |
| Hymenoptera            | <i>Osmia cornuta</i>             | GAGH01066955_2                   | KPPNCARCRNHLKILKLGKHKRYCRYRCCI-CQECIATKARQIKMAQ  | DTVEVLLECSKTLLEFLYFVETPLIYVVLKDKARS-DVKE-ASNRILEAQEPTSCAGLNDAAR    |
| Raphidioptera          | <i>Xanthostigma xanthostigma</i> | GAYU01017467_1                   | TPPNCARCRNHLKILKLGKHKRYCRYRCCI-CQECIATKARQIKMAQ  | HNVEVLNVCYHRLDTPFYFVETPLIYVVLKDKARS-DVKE-ASNRILEAQEPTSCAGLNDAAR    |
| Raphidioptera          | <i>Inocellia crassicornis</i>    | GAZH01013937_4                   | TPPNCARCRNHLKILKLGKHKRYCRYRCCI-CQECIATKARQIKMAQ  | HNVEVLNVCYHRLDTPFYFVETPLIYVVLKDKARS-DVKE-ASNRILEAQEPTSCAGLNDAAR    |
| Megaloptera            | <i>Corydalus cornutus</i>        | GATG01001294_4                   | TPPNCARCRNHLKILKLGKHKRYCRYRCCI-CQECIATKARQIKMAQ  | NNIEVLNVCYHRLDTPFYFVETPLIYVVLKDKARS-DVKE-ASNRILEAQEPTSCAGLNDAAR    |
| Neuroptera             | <i>Conwentzia psociformis</i>    | GAYH01007785_3                   | APPNCARCRNHLKILKLGKHKRYCRYRCCI-CQECIATKARQIKMAQ  | VPSEALDKCHALLDKFYFVETPLIYVVLKDKARS-DVKE-ASNRILEAQEPTSCAGLNDAAR     |
| Neuroptera             | <i>Osmylus fulvicephalus</i>     | GAYC01086997_6                   | TPPNCARCRNHLKILKLGKHKRYCRYRCCI-CQECIATKARQIKMAQ  | KQEVVLEVCYHRLDTPFYFVETPLIYVVLKDKARS-DVKE-ASNRILEAQEPTSCAGLNDAAR    |
| Strepsiptera           | <i>Stylops melittae</i>          | GAZM01003841_2                   | TPPNCARCRNHLKILKLGKHKRYCRYRCCI-CQECIATKARQIKMAQ  | INTEGIDISYQKLMIEFYFVETPLIYVVLKDKARS-DVKE-ASNRILEAQEPTSCAGLNDAAR    |
| Coleoptera             | <i>Meloe violaceus</i>           | GATA01048201_6                   | TPPNCARCRNHLKILKLGKHKRYCRYRCCI-CQECIATKARQIKMAQ  | AQSTDLLEDCQKLLERFYFVETPLIYVVLKDKARS-DVKE-ASNRILEAQEPTSCAGLNDAAR    |
| Coleoptera             | <i>Meloe violaceus</i>           | GATA01002860_6                   | <OD2 singleton>                                  | RGAEMLLEDCQKLLERFYFVETPLIYVVLKDKARS-DVKE-ASNRILEAQEPTSCAGLNDAAR    |
| Coleoptera             | <i>Gyrinus marinus</i>           | GAYU01008867_1                   | TPPNCARCRNHLKILKLGKHKRYCRYRCCI-CQECIATKARQIKMAQ  | GQSTELLEDQKLLERFYFVETPLIYVVLKDKARS-DVKE-ASNRILEAQEPTSCAGLNDAAR     |
| Coleoptera             | <i>Gyrinus marinus</i>           | GAYU01008867_1                   | TPPNCARCRNHLKILKLGKHKRYCRYRCCI-CQECIATKARQIKMAQ  | GQSTELLEDQKLLERFYFVETPLIYVVLKDKARS-DVKE-ASNRILEAQEPTSCAGLNDAAR     |
| Coleoptera             | <i>Meligethes aeneus</i>         | GAPD01021632_6                   | TPPNCARCRNHLKILKLGKHKRYCRYRCCI-CQECIATKARQIKMAQ  | HQSTDLLEDQKLLERFYFVETPLIYVVLKDKARS-DVKE-ASNRILEAQEPTSCAGLNDAAR     |
| Coleoptera             | <i>Meligethes aeneus</i>         | GAPD01021632_6                   | TPPNCARCRNHLKILKLGKHKRYCRYRCCI-CQECIATKARQIKMAQ  | HQSTDLLEDQKLLERFYFVETPLIYVVLKDKARS-DVKE-ASNRILEAQEPTSCAGLNDAAR     |
| Coleoptera             | <i>Aleochara curtula</i>         | GATW01000814_5                   | TPPNCARCRNHLKILKLGKHKRYCRYRCCI-CQECIATKARQIKMAQ  | VHSTDLMEDCQKLLERFYFVETPLIYVVLKDKARS-DVKE-ASNRILEAQEPTSCAGLNDAAR    |
| Coleoptera             | <i>Pogonus chalcus</i>           | JU430525_5                       | TPPNCARCRNHLKILKLGKHKRYCRYRCCI-CQECIATKARQIKMAQ  | GQSTELLEDQKLLERFYFVETPLIYVVLKDKARS-DVKE-ASNRILEAQEPTSCAGLNDAAR     |
| Coleoptera             | <i>Dendroctonus frontalis</i>    | GATF01011207_3                   | TPPNCARCRNHLKILKLGKHKRYCRYRCCI-CQECIATKARQIKMAQ  | DRSMDLLEDQKLLERFYFVETPLIYVVLKDKARS-DVKE-ASNRILEAQEPTSCAGLNDAAR     |
| Trichoptera            | <i>Annulipalpia</i> sp. AD-2013  | GATX01084595_6                   | TPPNCARCRNHLKILKLGKHKRYCRYRCCI-CQECIATKARQIKMAQ  | PLFENMLDNCQKLEKQYFVETPLIYVVLKDKARS-DVKE-ASNRILEAQEPTSCAGLNDAAR     |
| Lepidoptera            | <i>Nemophora degeerella</i>      | GATC01014479_1                   | APPNCARCRNHLKILKLGKHKRYCRYRCCI-CQECIATKARQIKMAQ  | HSLEALVENCYHRLDTPFYFVETPLIYVVLKDKARS-DVKE-ASNRILEAQEPTSCAGLNDAAR   |
| Lepidoptera            | <i>Parides eurimedus</i>         | GAXH01085310_6                   | APPNCARCRNHLKILKLGKHKRYCRYRCCI-CQECIATKARQIKMAQ  | VSLETVENCYHRLDTPFYFVETPLIYVVLKDKARS-DVKE-ASNRILEAQEPTSCAGLNDAAR    |
| Lepidoptera            | <i>Spodoptera litura</i>         | GBYB01009273_1                   | APPNCARCRNHLKILKLGKHKRYCRYRCCI-CQECIATKARQIKMAQ  | VSLNVLVENCYHRLDTPFYFVETPLIYVVLKDKARS-DVKE-ASNRILEAQEPTSCAGLNDAAR   |
| Lepidoptera            | <i>Trichoplusia ni</i>           | GBKU01001268_4                   | APPNCARCRNHLKILKLGKHKRYCRYRCCI-CQECIATKARQIKMAQ  | VSLDALVENCYHRLDTPFYFVETPLIYVVLKDKARS-DVKE-ASNRILEAQEPTSCAGLNDAAR   |
| Lepidoptera            | <i>Helicoverpa armigera</i>      | GBDM01028004_1                   | APPNCARCRNHLKILKLGKHKRYCRYRCCI-CQECIATKARQIKMAQ  | VSPFVLENCYHRLDTPFYFVETPLIYVVLKDKARS-DVKE-ASNRILEAQEPTSCAGLNDAAR    |
| Siphonaptera           | <i>Ceratophyllus gallinae</i>    | GAWK01054083_5                   | TPPNCARCRNHLKILKLGKHKRYCRYRCCI-CQECIATKARQIKMAQ  | EEVKTLLLESQKLEKQYFVETPLIYVVLKDKARS-DVKE-ASNRILEAQEPTSCAGLNDAAR     |
| Siphonaptera           | <i>Cenotaphus felis</i>          | GAYP01008255_1                   | TPPNCARCRNHLKILKLGKHKRYCRYRCCI-CQECIATKARQIKMAQ  | EKVALLLESQKLEKQYFVETPLIYVVLKDKARS-DVKE-ASNRILEAQEPTSCAGLNDAAR      |
| Siphonaptera           | <i>Oropsylla silantiewi</i>      | GAWY01012876_1                   | TPPNCARCRNHLKILKLGKHKRYCRYRCCI-CQECIATKARQIKMAQ  | EEVKTLLLESQKLEKQYFVETPLIYVVLKDKARS-DVKE-ASNRILEAQEPTSCAGLNDAAR     |
| Mecoptera              | <i>Boreus hyemalis</i>           | GAYK01000638_3                   | TPPNCARCRNHLKILKLGKHKRYCRYRCCI-CQECIATKARQIKMAQ  | SDARDYVQMYRLLDHPFYFVETPLIYVVLKDKARS-DVKE-ASNRILEAQEPTSCAGLNDAAR    |
| Mecoptera              | <i>Boreus hyemalis</i>           | GAYK01015512_3                   | <OD2 singleton>                                  | YSDKRVFDLSQKLEKQYFVETPLIYVVLKDKARS-DVKE-ASNRILEAQEPTSCAGLNDAAR     |
| Mecoptera              | <i>Boreus hyemalis</i>           | GAYK01017535_4                   | <OD2 singleton>                                  | YFDKRVFDLSQKLEKQYFVETPLIYVVLKDKARS-DVKE-ASNRILEAQEPTSCAGLNDAAR     |
| Diptera                | <i>Bombylius major</i>           | GATD01007470_4                   | TPPNCARCRNHLKILKLGKHKRYCRYRCCI-CQECIATKARQIKMAQ  | QNAELLEVCQKLEKQYFVETPLIYVVLKDKARS-DVKE-ASNRILEAQEPTSCAGLNDAAR      |
| Diptera                | <i>Bombylius major</i>           | GATD01007471_5                   | TPPNCARCRNHLKILKLGKHKRYCRYRCCI-CQECIATKARQIKMAQ  | QNAELLEVCQKLEKQYFVETPLIYVVLKDKARS-DVKE-ASNRILEAQEPTSCAGLNDAAR      |
| Diptera                | <i>Triarthra setipennis</i>      | GAVT01013308_3                   | TPPNCARCRNHLKILKLGKHKRYCRYRCCI-CQECIATKARQIKMAQ  | NSIDLILDYQKLEKQYFVETPLIYVVLKDKARS-DVKE-ASNRILEAQEPTSCAGLNDAAR      |
| Diptera                | <i>Trichocera saltator</i>       | GAXD01015564_6                   | TPPNCARCRNHLKILKLGKHKRYCRYRCCI-CQECIATKARQIKMAQ  | QNTFELLEYQKLEKQYFVETPLIYVVLKDKARS-DVKE-ASNRILEAQEPTSCAGLNDAAR      |
| Diptera                | <i>Liparia lucens</i>            | GAZJ01014428_8                   | TPPNCARCRNHLKILKLGKHKRYCRYRCCI-CQECIATKARQIKMAQ  | TEDQFVLYNCKLEKQYFVETPLIYVVLKDKARS-DVKE-ASNRILEAQEPTSCAGLNDAAR      |
| Diptera                | <i>Drosophila miranda</i>        | GALP01005259_3                   | TPPNCARCRNHLKILKLGKHKRYCRYRCCI-CQECIATKARQIKMAQ  | LGQDFVLYNCKLEKQYFVETPLIYVVLKDKARS-DVKE-ASNRILEAQEPTSCAGLNDAAR      |
| Diptera                | <i>Sitidiplosis mosellana</i>    | GAKJ01011849_2                   | TPPNCARCRNHLKILKLGKHKRYCRYRCCI-CQECIATKARQIKMAQ  | NDADMLESQKLEKQYFVETPLIYVVLKDKARS-DVKE-ASNRILEAQEPTSCAGLNDAAR       |
| Diptera                | <i>Teleopsis dalmani</i>         | GBBP01063334_1                   | TPPNCARCRNHLKILKLGKHKRYCRYRCCI-CQECIATKARQIKMAQ  | PPFDLILGSEKLLKQFYFVETPLIYVVLKDKARS-DVKE-ASNRILEAQEPTSCAGLNDAAR     |
| Diptera                | <i>Bactrocera dorsalis</i>       | GAKP01007048_1                   | TPPNCARCRNHLKILKLGKHKRYCRYRCCI-CQECIATKARQIKMAQ  | LAQDFVLEHCQKLEKQYFVETPLIYVVLKDKARS-DVKE-ASNRILEAQEPTSCAGLNDAAR     |
| Diptera                | <i>Ceratitis capitata</i>        | GAMC01004171_3                   | TPPNCARCRNHLKILKLGKHKRYCRYRCCI-CQECIATKARQIKMAQ  | LAQDFVLEHCQKLEKQYFVETPLIYVVLKDKARS-DVKE-ASNRILEAQEPTSCAGLNDAAR     |
| Diptera                | <i>Anopheles quadrimaculatus</i> | GBTB01014262_1                   | TPPNCARCRNHLKILKLGKHKRYCRYRCCI-CQECIATKARQIKMAQ  | LPDDELVKRAQWLEKQYFVETPLIYVVLKDKARS-DVKE-ASNRILEAQEPTSCAGLNDAAR     |
| Diptera                | <i>Aedes albopictus</i>          | GAPW01003320_1                   | TPPNCARCRNHLKILKLGKHKRYCRYRCCI-CQECIATKARQIKMAQ  | LPDDELVKRAQWLEKQYFVETPLIYVVLKDKARS-DVKE-ASNRILEAQEPTSCAGLNDAAR     |
| Diptera                | <i>Psorophora albipes</i>        | GALA01000925_1                   | TPPNCARCRNHLKILKLGKHKRYCRYRCCI-CQECIATKARQIKMAQ  | RTDDELVKRSQYLLKQYFVETPLIYVVLKDKARS-DVKE-ASNRILEAQEPTSCAGLNDAAR     |
| Diptera                | <i>Anopheles funestus</i>        | E2974425_2                       | TPPNCARCRNHLKILKLGKHKRYCRYRCCI-CQECIATKARQIKMAQ  | LPDDELVKRAQWLEKQYFVETPLIYVVLKDKARS-DVKE-ASNRILEAQEPTSCAGLNDAAR     |
| Diptera                | <i>Cerethrella appendiculata</i> | GAN001004847_1                   | TAPNCAQRNHLKILKLGKHKRYCRYRCCI-CQECIATKARQIKMAQ   | MQNDLLEKSHQLEKQYFVETPLIYVVLKDKARS-DVKE-ASNRILEAQEPTSCAGLNDAAR      |
| Diptera                | <i>Culicoides sonorensis</i>     | GAWM01002290_1                   | TPPNCARCRNHLKILKLGKHKRYCRYRCCI-CQECIATKARQIKMAQ  | RKTDRILDNDCTLCRSYFVETPLIYVVLKDKARS-DVKE-ASNRILEAQEPTSCAGLNDAAR     |
| Diptera                | <i>Belgica antarctica</i>        | GAAK01007185_1                   | TPPNCARCRNHLKILKLGKHKRYCRYRCCI-CQECIATKARQIKMAQ  | NNNDNFWDMAQMDARDNYFVETPLIYVVLKDKARS-DVKE-ASNRILEAQEPTSCAGLNDAAR    |
| Diptera                | <i>Belgica antarctica</i>        | GAAK01003177_1                   | KGSCVCRNHLKILKLGKHKRYCRYRCCI-CQECIATKARQIKMAQ    | KDKALPDCSEKLLKQYFVETPLIYVVLKDKARS-DVKE-ASNRILEAQEPTSCAGLNDAAR      |

Figure S2

| Order                 | Species                            | [Accession]_[frame]/[range]                    | Sequence                                          | HMM e-val |
|-----------------------|------------------------------------|------------------------------------------------|---------------------------------------------------|-----------|
| Protura               | <i>Acerentomon</i> sp. AD-2013     | GAXE01105806.1_2/58-86                         | RLPKCARCINHGLKIPLKGHKRYCTNKYCDP-----              | 8.5e-13   |
| Collembola            | <i>Sminthurus viridis</i>          | FCD0GUKACXX:7:1301:17137:108047:3 <sup>1</sup> | TPPNCARCRNHRLKIPLRGHKRYCRFRCTCKQKCILTAERQVRVMAQ   | 2.0e-14*  |
| Archaeognatha         | <i>Lepismachilis y-signata</i>     | Contig_383881 <sup>2</sup>                     | APPNCARCRNHRLKVELKGHKRYCKYRYCNCEKRLTADRQVRVMAQ    | 7.2e-28*  |
| Zygentoma             | <i>Thermobia domestica</i>         | GASN01365969.1_4/81-127                        | TPPKCARCRNHRLKIPLKGHKRYCKYRFKCNCDKCLLTAERQVRVMAQ  | 1.3e-29   |
| Odonata               | <i>Calopteryx splendens</i>        | GAYM01080693.1_4/36-82                         | TPPKCARCRNHLYKIPLKGHKRYCKFRYCKCDKCLLTAERQVRVMAQ   | 1.4e-29   |
| Ephemeroptera         | <i>Isonychia bicolor</i>           | GAXA01091320.1_6/79-119                        | TPPKCARCRNHRLKIPLRGHKRYCNRYRYCNCEKCLTADRR-----    | 1.9e-24   |
| Ephemeroptera         | <i>Baetis</i> sp. AD-2013          | GATU01010243.1_2/88-133                        | SNRMCAQCQNHGLKIPVVRGHRKFCFKFRLCNCQNCLLVKERQRIVALH | 1.2e-20   |
| Ephemeroptera         | <i>Eurylophella</i> sp. AD-2013    | GZG01080309.1_5/8-52                           | ASRLCAFRCRNHSLKIPVKGHRKFCRNRTCNAECKLVREERQVRVALH  | 1.9e-20   |
| Dermaptera            | <i>Apachyus charteceus</i>         | GAUW01001274.1_3/14-59                         | KTPNCARCRNHVYVKIKLKGHKRYCKYRNCRCNKCTLTAERQRIMAAQ  | 4.8e-28   |
| Dermaptera            | <i>Forficula auricularia</i>       | GAYQ01017359.1_5/107-152                       | KAPNCARCRNHLYKMLKGHKRYCKFRYCECSKRLTYERQVRVMAQ     | 2.3e-27   |
| Plecoptera            | <i>Leuctra</i> sp. AD-2013         | GAUF01079838.1_5/141-187                       | TPPKCARCRNHVDKITLKGHRKFCAFRFKCNCEKCLTVERQVRVMAQ   | 3.0e-27   |
| Plecoptera            | <i>Cosmioperla kuna</i>            | GAYL01095698.1_6/28-74                         | TPPNCARCRNHLLKIALKGHKRFCKRYRYCECDKRLTAERQVRVMAQ   | 3.4e-29   |
| Grylloblattodea       | <i>Grylloblatta bifratrilecta</i>  | GAWP01142412.1_3/58-104                        | TPPNCARCRNHRLKIGLKGHKRYCKYRASPDCDKCLLTAERQVRVMAQ  | 5.4e-29   |
| Grylloblattodea       | <i>Galloisiana yuasai</i>          | GAWN01171825.1_4/47-93                         | TPPNCARCRNHRLKIGLKGHKRYCKYRHCCTCDKCLLTAERQVRVMAQ  | 2.0e-30   |
| Embioptera            | <i>Haploembia palaui</i>           | GAZA01236824.1_5/84-130                        | TPPNCARCRNHNFKIGLKGHKRYCRFRSCTCSKCLLTAERQVRVMAQ   | 3.3e-28   |
| Mantodea              | <i>Empusa pennata</i>              | GAWT01309511.1_4/111-157                       | TPPNCARCRNHRLKIGLKGHKRYCKYRYCNCDKCLLTAERQVRVMAQ   | 2.8e-30   |
| Blattodea             | <i>Periplaneta americana</i>       | GAWS01015027.1_4/1-44                          | ---NCARCRNHRLKIGLKGHKRYCKYRYCNCDKCLLTAERQVRVMAQ   | 1.2e-28   |
| Blattodea             | <i>Blatella germanica</i> genome   | JPZV01136765.1_2/621-668                       | JPPNCARCRNHRLKIGLKGHKRYCTFRSVCCEKCLLTAERQVRVMAQ   | 1.7e-15*  |
| Isoptera              | <i>Prorhinotermes simplex</i>      | GASE01075660.1_4/15-55                         | KIKYCSKSAHTTKVQIKNHKNKCPFKDCLKDCIPIIVRRDSTALA     | 7.6e-08   |
| Hemiptera             | <i>Xenophysella greensladeae</i>   | GAYI01136691.1_3/24-70                         | TAPNCARCRNHGQKIPLKGHKRYCCFRDCCEMCLLTAKRQKVMALQ    | 1.7e-27   |
| Hemiptera             | <i>Planococcus citri</i>           | GAXF01116661.1_1/146-191                       | TAPNCARCKNHGLKIPLKGHKRYCRFWNCVCEKCVQTSRQKVMARE    | 1.2e-22   |
| Hemiptera             | <i>Planococcus citri</i>           | GAXF01103858.1_1/43-88                         | TPPNCARCKNHGLKNVLSGHKRYCLYLECKCEKCLATVGRQRSMKN    | 4.9e-20   |
| Hemiptera             | <i>Acanthosoma haemorrhoidale</i>  | GAUV01009568.1_3/70-108                        | KVKYCAKCKNHGRKEEMKGHKRECERRHCSQATEKKRAKTRIQ       | 7.1e-12   |
| Psocodea (Psocoptera) | <i>Ectopsocus briggsi</i>          | GAPT01011620.1_2/92-137                        | KIPYCGRCRNHGIKEVLKGHKHKCIYRDCCTGSCMLSVNRREIAKKQ   | 8.3e-20   |
| Psocodea (Psocoptera) | <i>Ectopsocus briggsi</i>          | GAPT01002163.1_6/155-201                       | TPPICNRCKVHGVRQSLKGHKRYCRFLTCDLCLVVEKRVVMAQ       | 4.3e-15   |
| Neuroptera            | <i>Pseudomallada prasinus</i>      | GAVV01019538.1_2/82-128                        | TPPNCARCRNHRLKIPLRGHKRYCRFRNCICHKCLLTAERQVRVMAQ   | 2.2e-28   |
| Neuroptera            | <i>Conwentzia psociformis</i>      | GAYH01007786.1_3/137-182                       | APPNCARCRNHRLKIPLKGHKRYCRYKRCSSKCLLTLRQVQDMAQ     | 3.7e-22   |
| Neuroptera            | <i>Euroleon nostras</i>            | GAXW01087396.1_4/25-71                         | TPPNCARCRNHRLKIPLRGHKRYCRFRCTCEKCLLTAERQVRVMAQ    | 7.1e-29   |
| Coleoptera            | <i>Lepicerus</i> sp. AD-2013       | GAZB01138597.1_2/45-91                         | TLPNCARCRNHSLIKEPLKGHKRYCKFKKCCQCEKCLLTAERQVRVMAQ | 6.4e-28   |
| Trichoptera           | <i>Rhyacophila fasciata</i>        | GAXX01046516.1_4/10-56                         | TPPNCARCRNHGLKIGLKGHKRYCKYRYCTCEKCLLTAERQVRVMAQ   | 4.8e-31   |
| Trichoptera           | <i>Platycentropus radiatus</i>     | GASS01092876.1_3/184-204                       | TPPNCARCRNHRLKIALKGHK-----                        | 4.0e-08   |
| Trichoptera           | <i>Hydroptila</i> sp. AD-2013      | GAVM01073298.1_1/112-158                       | TPPNCARCRNHRLKIALKGHKRYCKFRHCNDRCLLTAERQVRVMAQ    | 3.6e-29   |
| Lepidoptera           | <i>Yponomeuta evonymellus</i>      | GASG01093141.1_4/23-68                         | APPNCARCRNHRLKVELKGHKRYCKYRYCNCEKRLTADRQVRVMAQ    | 3.2e-30   |
| Lepidoptera           | <i>Polyommatus icarus</i>          | GAST01056365.1_4/55-86                         | APPNCARCRNHRLKIQLKGHKRYCKYRYCTCEK-----            | 1.1e-19   |
| Lepidoptera           | <i>Dyseriocrania subpurpurella</i> | GASY01015364.1_1/256-302                       | TPPNCARCRNHQVKVALKGHKRYCRYRYCNCDKRLTADRQVRVMAQ    | 2.5e-29   |
| Lepidoptera           | <i>Trodia sylvina</i>              | GAVB01150705.1_2/60-106                        | TPPNCARCRNHVKEKLGHKRYCKYRYCNCDKCLLTAERQVRVMAQ     | 1.9e-30   |
| Siphonaptera          | <i>Ctenocephalides felis</i>       | GAYP01006643.1_1/27-73                         | TPPNCARCRNHRLKIALKGHKRYCRYLYCKCEKCLLTAERQVRVMAQ   | 6.6e-29   |
| Mecoptera             | <i>Panorpa vulgaris</i>            | GAUH01062093.1_3/57-103                        | TPPNCARCRNHRLKIALKGHKRYCTFKFCNCEKRLTADRQVRVMAQ    | 1.5e-28   |
| Diptera               | <i>Bibio marci</i>                 | GATJ01056020.1_6/139-184                       | TQPNCARCRNHCKYVLLKGHKHYCRFRYCKCEKCVVTAQRQDIMANE   | 2.7e-25   |

Figure S3

| Order                | Species                              | [Accession]_[frame]/[range] | HMM aligned sequence                             | HMM e-val |
|----------------------|--------------------------------------|-----------------------------|--------------------------------------------------|-----------|
| Archaeognatha        | <i>Meinertellus cundinamarcensis</i> | GAUG01133643.1_3/44-81      | -TPKCARCRNHGIVISLKGHKRLCRWRECCPCNQLVVERQRMVMAA   | 5.6e-15   |
| Blattodea            | <i>Periplaneta americana</i>         | GAWS01189376.1_5/2-47       | -TPKCARCRNHGIVISLKGHKRLCRWRECCPCNQLVVERQRMVMAA   | 7e-21     |
| Blattodea            | <i>Cryptocercus wright</i>           | GAZN01162439.1_6/11-56      | -RPKCARCRNHGIVISLKGHKRQCRFKSCVCAKCNLTAERQRMVMAA  | 1.2e-20   |
| Calanoida            | <i>Calanus finmarchicus</i>          | GAXK01154012.1_1/25-70      | -RPFKCARCRNHGIVISLKGHKRSCQYRDCDAKCNLQERQRMVMAA   | 3.1e-21   |
| Calanoida            | <i>Calanus finmarchicus</i>          | GAXK01154011.1_1/25-70      | -RPFKCARCRNHGIVISLKGHKRSCQYRDCDAKCNLQERQRMVMAA   | 3.2e-21   |
| Coleoptera           | <i>Aleochara curtula</i>             | GATW01017006.1_5/27-72      | -VFKCARCRNHGIVISLKGHKRQCRFKSCVCAKCNLTAERQRMVMAA  | 4.6e-20   |
| Coleoptera           | <i>Ips typographus</i>               | GACR01003199.1_2/53-98      | -VFKCARCRNHGIVISLKGHKRQCRFKSCVCAKCNLTAERQRMVMAA  | 7.4e-20   |
| Collembola           | <i>Tetrodontophora bielanensis</i>   | GAXI01024987.1_5/8-53       | -TPKCARCRNHGIVISLKGHKRQCRFKSCVCAKCNLTAERQRMVMAA  | 8.8e-21   |
| Collembola           | <i>Pogonognathellus sp. AD-2013</i>  | GATD01092185.1_3/9-54       | -TPKCARCRNHGIVISLKGHKRQCRFKSCVCAKCNLTAERQRMVMAA  | 2.1e-19   |
| Collembola           | <i>Anurida maritima</i>              | GAUE01052744.1_3/128-173    | -APKCARCRNHGIVISLKGHKRQCRFKSCVCAKCNLTAERQRMVMAA  | 1.2e-18   |
| Diptera              | <i>Culicoides sonorensis</i>         | GAWM01017604.1_1/28-73      | -TPKCARCRNHGIVISLKGHKRQCRFKSCVCAKCNLTAERQRMVMAA  | 5e-20     |
| Diptera              | <i>Trichocera saltator</i>           | GAXZ01130618.1_6/9-54       | -TPKCARCRNHGIVISLKGHKRQCRFKSCVCAKCNLTAERQRMVMAA  | 2.2e-19   |
| Ephemeroptera        | <i>Isonychia bicolor</i>             | GAXA01106317.1_1/122-167    | -TPKCARCRNHGIVISLKGHKRQCRFKSCVCAKCNLTAERQRMVMAA  | 5e-21     |
| Ephemeroptera        | <i>Eurylophella sp. AD-2013</i>      | GAZG01012200.1_6/32-77      | -SPKCARCRNHGIVISLKGHKRQCRFKSCVCAKCNLTAERQRMVMAA  | 4.7e-20   |
| Grylloblattodea      | <i>Galloisiana yuasai</i>            | GAWN01063629.1_6/2-47       | -RPFKCARCRNHGIVISLKGHKRQCRFKSCVCAKCNLTAERQRMVMAA | 4.2e-21   |
| Hemiptera            | <i>Graminella nigrifrons</i>         | GAQX01025711.1_6/87-133     | TPPNCARCRNHGIVISLKGHKRQCRFKSCVCAKCNLTAERQRMVMAA  | 3.6e-24   |
| Hemiptera            | <i>Cercopis vulnerata</i>            | GAUN01102337.1_4/98-144     | TSPNCARCRNHGIVISLKGHKRQCRFKSCVCAKCNLTAERQRMVMAA  | 9.7e-23   |
| Hemiptera            | <i>Macrosiphum euphorbiae</i>        | GAOM01011235.1_1/7-52       | -RPFKCARCRNHGIVISLKGHKRQCRFKSCVCAKCNLTAERQRMVMAA | 2.4e-19   |
| Hemiptera            | <i>Cercopis vulnerata</i>            | GAUN01003127.1_4/8-53       | -TPKCARCRNHGIVISLKGHKRQCRFKSCVCAKCNLTAERQRMVMAA  | 2.8e-18   |
| Hemiptera            | <i>Nilaparvata lugens</i>            | GAYF01062266.1_2/4-49       | -HPKCARCRNHGIVISLKGHKRQCRFKSCVCAKCNLTAERQRMVMAA  | 1e-15     |
| Hemiptera            | <i>Acanthosuarina muelleriana</i>    | GAYY01137565.1_1/301-346    | TLFPNCARCRNHGIVISLKGHKRQCRFKSCVCAKCNLTAERQRMVMAA | 4.4e-16   |
| Hemiptera            | <i>Cercopis vulnerata</i>            | GAUN01092972.1_3/100-120    | -PPNCARCRNHGIVISLKGHKRQCRFKSCVCAKCNLTAERQRMVMAA  | 1.2e-05   |
| Hymenoptera          | <i>Ganaspis sp. G1</i>               | GAIW01023601.1_3/89-135     | TKPNCARCRNHGIVISLKGHKRQCRFKSCVCAKCNLTAERQRMVMAA  | 1.9e-22   |
| Hymenoptera          | <i>Ganaspis sp. G1</i>               | GAIW01012036.1_5/215-260    | -STNCGYCRNHGIVISLKGHKRQCRFKSCVCAKCNLTAERQRMVMAA  | 1.5e-20   |
| Hymenoptera          | <i>Leptopilina clavipes</i>          | GAXY01053312.1_1/30-75      | -KPFKCARCRNHGIVISLKGHKRQCRFKSCVCAKCNLTAERQRMVMAA | 1.5e-20   |
| Hymenoptera          | <i>Stigmatomma oregonense</i>        | GAXR01000833.1_2/51-96      | -RPFKCARCRNHGIVISLKGHKRQCRFKSCVCAKCNLTAERQRMVMAA | 4.2e-20   |
| Hymenoptera          | <i>Ganaspis sp. G1</i>               | GAIW01012035.1_5/481-526    | -STNCGYCRNHGIVISLKGHKRQCRFKSCVCAKCNLTAERQRMVMAA  | 4.7e-20   |
| Hymenoptera          | <i>Cotesia vestalis</i>              | GAUP01064990.1_1/26-71      | -SPKCARCRNHGIVISLKGHKRQCRFKSCVCAKCNLTAERQRMVMAA  | 1.2e-19   |
| Hymenoptera          | <i>Cotesia vestalis</i>              | GAUP01004774.1_1/35-80      | -RPFKCARCRNHGIVISLKGHKRQCRFKSCVCAKCNLTAERQRMVMAA | 2e-19     |
| Hymenoptera          | <i>Cotesia vestalis</i>              | GAGK01004932.1_5/23-68      | -SPKCARCRNHGIVISLKGHKRQCRFKSCVCAKCNLTAERQRMVMAA  | 3.1e-19   |
| Hymenoptera          | <i>Osmia cornuta</i>                 | GAGH01047348.1_5/369-414    | -RPFKCARCRNHGIVISLKGHKRQCRFKSCVCAKCNLTAERQRMVMAA | 2.7e-19   |
| Hymenoptera          | <i>Mischocyttarus flavitarsis</i>    | GAXM01016837.1_6/60-105     | -SPKCARCRNHGIVISLKGHKRQCRFKSCVCAKCNLTAERQRMVMAA  | 7.6e-19   |
| Hymenoptera          | <i>Sphaerophthalma orestes</i>       | GAXP01040437.1_2/70-113     | -RPFKCARCRNHGIVISLKGHKRQCRFKSCVCAKCNLTAERQRMVMAA | 1e-19     |
| Hymenoptera          | <i>Stigmatomma oregonense</i>        | GAXR01010442.1_4/19-64      | -SPKCARCRNHGIVISLKGHKRQCRFKSCVCAKCNLTAERQRMVMAA  | 1.5e-18   |
| Hymenoptera          | <i>Orussus abietinus</i>             | GAUJ01091006.1_5/57-102     | -SPKCARCRNHGIVISLKGHKRQCRFKSCVCAKCNLTAERQRMVMAA  | 1.7e-18   |
| Hymenoptera          | <i>Tenthredo koehleri</i>            | GAWW01088411.1_2/215-260    | -SPKCARCRNHGIVISLKGHKRQCRFKSCVCAKCNLTAERQRMVMAA  | 3.6e-18   |
| Hymenoptera          | <i>Chyphotes mellipes</i>            | GAXL01043353.1_1/29-74      | -SPKCARCRNHGIVISLKGHKRQCRFKSCVCAKCNLTAERQRMVMAA  | 4.9e-18   |
| Hymenoptera          | <i>Pseudomasaris vespoides</i>       | GAXQ01011632.1_5/152-197    | -SPKCARCRNHGIVISLKGHKRQCRFKSCVCAKCNLTAERQRMVMAA  | 5.3e-18   |
| Hymenoptera          | <i>Pseudomasaris vespoides</i>       | GAXQ01011634.1_5/152-197    | -SPKCARCRNHGIVISLKGHKRQCRFKSCVCAKCNLTAERQRMVMAA  | 5.5e-18   |
| Hymenoptera          | <i>Pseudomasaris vespoides</i>       | GAXQ01011633.1_6/152-197    | -SPKCARCRNHGIVISLKGHKRQCRFKSCVCAKCNLTAERQRMVMAA  | 8.3e-18   |
| Hymenoptera          | <i>Pseudomasaris vespoides</i>       | GAXQ01011635.1_6/152-197    | -SPKCARCRNHGIVISLKGHKRQCRFKSCVCAKCNLTAERQRMVMAA  | 8.5e-18   |
| Hymenoptera          | <i>Cotesia vestalis</i>              | GAGK01010867.1_5/96-130     | -RPFKCARCRNHGIVISLKGHKRQCRFKSCVCAKCNLTAERQRMVMAA | 1.3e-13   |
| Isoptera             | <i>Mastotermes darwiniensis</i>      | GAZE01022571.1_3/6-51       | -TPKCARCRNHGIVISLKGHKRQCRFKSCVCAKCNLTAERQRMVMAA  | 3.7e-20   |
| Isoptera             | <i>Prorhinotermes simplex</i>        | GASE01241946.1_5/28-73      | -TPKCARCRNHGIVISLKGHKRQCRFKSCVCAKCNLTAERQRMVMAA  | 5.9e-20   |
| Isoptera             | <i>Nasutitermes takasagoensis</i>    | G5ZWOJF02FLJZ2_4/133-171    | TPPKCARCRNHGIVISLKGHKRQCRFKSCVCAKCNLTAERQRMVMAA  | 6.9e-08*  |
| Lepidoptera          | <i>Spodoptera exigua</i>             | GARL01010958.1_6/32-77      | -VFKCARCRNHGIVISLKGHKRQCRFKSCVCAKCNLTAERQRMVMAA  | 3.8e-20   |
| Lepidoptera          | <i>Polyommatus icarus</i>            | GAST01022246.1_6/28-73      | -TPKCARCRNHGIVISLKGHKRQCRFKSCVCAKCNLTAERQRMVMAA  | 1.6e-20   |
| Lepidoptera          | <i>Athetis lepigone</i>              | GARB01040060.1_3/51-96      | -VFKCARCRNHGIVISLKGHKRQCRFKSCVCAKCNLTAERQRMVMAA  | 2.4e-19   |
| Lepidoptera          | <i>Yponomeuta evonymellus</i>        | GASG01107059.1_5/89-129     | -TPKCARCRNHGIVISLKGHKRQCRFKSCVCAKCNLTAERQRMVMAA  | 3.2e-16   |
| Mantodea             | <i>Metallyticus splendidus</i>       | GATB01281539.1_1/31-76      | -TPKCARCRNHGIVISLKGHKRQCRFKSCVCAKCNLTAERQRMVMAA  | 1.7e-20   |
| Mecoptera            | <i>Nannochorista philpotti</i>       | GADB01005720.1_1/40-85      | -TPKCARCRNHGIVISLKGHKRQCRFKSCVCAKCNLTAERQRMVMAA  | 6.9e-19   |
| Mecoptera            | <i>Nannochorista philpotti</i>       | GADB01001122.1_6/166-211    | -TPKCARCRNHGIVISLKGHKRQCRFKSCVCAKCNLTAERQRMVMAA  | 2.8e-19   |
| Mecoptera            | <i>Panorpa vulgaris</i>              | GAUH01056862.1_5/41-86      | -VFKCARCRNHGIVISLKGHKRQCRFKSCVCAKCNLTAERQRMVMAA  | 1.7e-18   |
| Neuroptera           | <i>Conwentzia psociformis</i>        | GAYH01081098.1_6/60-105     | -VFKCARCRNHGIVISLKGHKRQCRFKSCVCAKCNLTAERQRMVMAA  | 7.6e-20   |
| Neuroptera           | <i>Osmylus fulvicephalus</i>         | GAYC01008034.1_6/33-78      | -TPKCARCRNHGIVISLKGHKRQCRFKSCVCAKCNLTAERQRMVMAA  | 7.2e-18   |
| Orthoptera           | <i>Tetrix subulata</i>               | GASQ01096846.1_1/5-50       | -TPKCARCRNHGIVISLKGHKRQCRFKSCVCAKCNLTAERQRMVMAA  | 3.3e-21   |
| Orthoptera           | <i>Ceuthophilus sp. AD-2013</i>      | GAUX01271954.1_3/33-78      | -TPKCARCRNHGIVISLKGHKRQCRFKSCVCAKCNLTAERQRMVMAA  | 3.7e-20   |
| Orthoptera           | <i>Prosarthria teretirostris</i>     | GAZT01143051.1_3/24-69      | -TPKCARCRNHGIVISLKGHKRQCRFKSCVCAKCNLTAERQRMVMAA  | 4e-19     |
| Orthoptera           | <i>Gryllotalpa sp. AD-2013</i>       | GAWZ01138841.1_4/2-47       | -TPKCARCRNHGIVISLKGHKRQCRFKSCVCAKCNLTAERQRMVMAA  | 1.8e-14   |
| Phasmatodea          | <i>Timema cristinae</i>              | GAVX01115626.1_6/41-86      | -TPKCARCRNHGIVISLKGHKRQCRFKSCVCAKCNLTAERQRMVMAA  | 6.4e-20   |
| Phthiraptera         | <i>Menopon gallinae</i>              | GAWR01095172.1_5/146-191    | -KPFKCARCRNHGIVISLKGHKRQCRFKSCVCAKCNLTAERQRMVMAA | 8.5e-20   |
| Phthiraptera         | <i>Menopon gallinae</i>              | GAWR01093074.1_6/87-132     | -TPKCARCRNHGIVISLKGHKRQCRFKSCVCAKCNLTAERQRMVMAA  | 5.7e-19   |
| Plecoptera           | <i>Leuctra sp. AD-2013</i>           | GAUF01064618.1_6/8-53       | -TPKCARCRNHGIVISLKGHKRQCRFKSCVCAKCNLTAERQRMVMAA  | 9.3e-21   |
| Psocoda (Psocoptera) | <i>Liposcelis bostrychophila</i>     | GAYV01083169.1_5/23-68      | -TPKCARCRNHGIVISLKGHKRQCRFKSCVCAKCNLTAERQRMVMAA  | 1.5e-20   |
| Raphidioptera        | <i>Inocellia crassicornis</i>        | GAZH01032725.1_5/40-78      | -IPKCARCRNHGIVISLKGHKRQCRFKSCVCAKCNLTAERQRMVMAA  | 9.8e-16   |
| Siphonaptera         | <i>Ceratophyllus gallinae</i>        | GAWK01044190.1_6/53-98      | -TPKCARCRNHGIVISLKGHKRQCRFKSCVCAKCNLTAERQRMVMAA  | 3.8e-20   |
| Siphonostomatoida    | <i>Caligus rogercresseyi</i>         | GAZX01023775.1_4/32-77      | -RPFKCARCRNHGIVISLKGHKRQCRFKSCVCAKCNLTAERQRMVMAA | 5.8e-20   |
| Thysanoptera         | <i>Thrips palmi</i>                  | GAXC01041671.1_5/35-80      | -TPKCARCRNHGIVISLKGHKRQCRFKSCVCAKCNLTAERQRMVMAA  | 2.1e-20   |
| Trichoptera          | <i>Rhyacophila fasciata</i>          | GAXX01069925.1_6/105-138    | -EPKCARCRNHGIVISLKGHKRQCRFKSCVCAKCNLTAERQRMVMAA  | 4.1e-12   |
| Zygentoma            | <i>Occasjapyx japonicas</i>          | GAXJ01053929.1_3/25-69      | --PKCARCRNHGIVISLKGHKRQCRFKSCVCAKCNLTAERQRMVMAA  | 3.4e-21   |
| Zygentoma            | <i>Tricholepidion gertschi</i>       | GASO01237223.1_5/12-57      | -TPKCARCRNHGIVISLKGHKRQCRFKSCVCAKCNLTAERQRMVMAA  | 7.4e-20   |
| Zygentoma            | <i>Occasjapyx japonicas</i>          | GAXJ01108043.1_3/66-111     | -TPKCARCRNHGIVISLKGHKRQCRFKSCVCAKCNLTAERQRMVMAA  | 1.3e-19   |
| Zoraptera            | <i>Zorotypus caudelli</i>            | GAYA01373377.1_2/34-79      | -TPKCARCRNHGIVISLKGHKRQCRFKSCVCAKCNLTAERQRMVMAA  | 5e-20     |

Figure S4

| Order            | Species                              | NCBI accession             | Sequence                                                             | HMM e-val |
|------------------|--------------------------------------|----------------------------|----------------------------------------------------------------------|-----------|
| Protura          | <i>Acerentomon sp. AD2013</i>        | GAXE01016537_1             | AATLIFQQRLEHLLNKFKLPVESLPAIYAVLKDAKGCVEEASERLMAAYEELHEISVRLGLL       | 9.8e-14   |
| Collembola       | <i>Anurida maritima</i>              | GAUE01011497_6             | MSVDGMKESLHALLEMFRFPLESPLVYRILKDYRADFRLLASSKIMEAQTELRSALLEAAR        | 2.7e-17   |
| Collembola       | <i>Pogonognathellus sp. AD-2013</i>  | GATD01095902_2             | GAEPLVDGMKESLQTLMDMFPNPLPLVYLILKDSRADFKLASTRILEAQBELRSIALREAR        | 7.8e-11   |
| Collembola       | <i>Orchesella cincta</i>             | GAMM01004046_1             | TAIDEMKESVKALMEMFRLPSETDPLIYRILKDYRGDFPKQASAKIFEAQCELRSWELLREAA      | 8.6e-12   |
| Diplura          | <i>Occasjapyx japonicus</i>          | GAXJ01108506_1             | DNVEEVNQALKVILKLFHLPDESCHLLVWVILKDAKGLMLASSRIMEAQSELRSMAFQDVTR       | 1.7e-15   |
| Archaeognatha    | <i>Meinertellus cundinamarcensis</i> | GAUG01186505_6             | ENVENVKESVYGLMDRFRLPSECLPLLYVILKDAKDFDIKEAANRIVDAQDLHAVTLREAQY       | 1.6e-20   |
| Archaeognatha    | <i>Lepismachilis y-signata</i>       | Contig_336923 <sup>1</sup> | VSLETLVENCNKLEKFKHFSWEMMPLVLVILNYAGSDLEASRKIDEGQWRSQTFCCAAN*-        | 5.6e-27*  |
| Zygentoma        | <i>Tricholepidion gertschi</i>       | GASO01035827_5             | EEGDVMMESLHALLEMFLPLETLPLIYVVLKDARS DVKEASNRI IEAQSELRSIF-----       | 3.3e-23   |
| Zygentoma        | <i>Thermobia domestica</i>           | GASN01345779_5             | ENVELLKDSLHALLDLDFRPLPLETLPLIYVVLKDARS DVKEASNRI IEGVYQCMNQGI IAPIG  | 2.4e-22   |
| Odonata          | <i>Calopteryx splendens</i>          | GAYM01004193_6             | DNMNF IKDAILALLQMFRLPVELPLIYAILQGARC DVKEATNQIQNAQEH LRAMALRMMYP     | 1.1e-19   |
| Ephemeroptera    | <i>Isonychia bicolor</i>             | GAXA01058460_2             | DNIDSLRDSIQTLTLDTRFLRPMETLPLVYVVLKVSRS DVQEA FNRI SEG GYHMTSSDVPVAAA | 1.2e-20   |
| Plecoptera       | <i>Leuctra sp. AD2013</i>            | GAUF01067748_5             | DGHEVPFESIRKLLERFRLPSEAQLLLAILKNSDYDSNEASKQIEIGGYNSSHPQ GK AISV      | 2.0e-14   |
| Plecoptera       | <i>Perla marginata</i>               | GATV01133007_4             | PYPDVHLGSI AKLIDMCHLSPETQPLILAILKLSKFDVKEAYKQIMAGGYFNKNCTSN---       | 3.6e-10   |
| Mantophasmatodea | <i>Tanzaniophasma sp. AD2013</i>     | GAXB01144312_2             | ENMDGLREAIHTLLKIFQLPLETLPLLYVVLKDARSDFTEAYNRIVEARNELETLARREAAC       | 6.6e-20   |
| Grylloblattodea  | <i>Galloisiana yuasai</i>            | GAWN01150275_2             | DHGKLLWESI QALREMFHLSQSDVPLIFLVLFNSHFDVMEASIRIKEGMFVI IEYLVGTCIV     | 2.3e-15   |
| Phasmatodea      | <i>Aretaon asperrimus</i>            | GAWC01030481_5             | VSVEAMMDGVYTL LHM FHYHVEMLP LLLVVLSDAHCDVSEAYNRILQVLGNHLD SVLPVTSS   | 4.3e-18   |
| Phasmatodea      | <i>Ramulus artemis</i>               | GAWE01101272_2             | VSVEAMMDGVYTL LHM FHYHVEMLP LLLVVLSDAHCDVTEAYNRILQCECAA-----         | 1.5e-18   |
| Blattodea        | <i>Blaberus atropos</i>              | GAYD01026473_5             | ESLEVTLQSMHYLMNTFRMPLEALPLVYVVLQLSHSDVSEATARI IKGSYST-----           | 6.0e-16   |
| Blattodea        | <i>Periplaneta americana</i>         | GAWS01246226_6             | -----QMLLEMFRFPVALPLIYVVLQVVSQSDVNVA YNR I IQAQEQLRSMALREAR          | 1.6e-15   |
| Blattodea        | <i>Blatella germanica genome</i>     | JPZV01136787_1             | ENQEVPLQSMQYLMDFFRMPMEALPLIYVVLQLSHSDVKEA TRI IKGSYSNVIFHI*-----     | 6.3e-06*  |
| Thysanoptera     | <i>Frankliniella occidentalis</i>    | GAXD01013559_1             | ENGRVHRESIQRLVEKFNFPVALPLIYVVLKDHGSDYEVKN-----                       | 1.1e-12   |
| Thysanoptera     | <i>Frankliniella cephalica</i>       | GAYE01005232_5             | ENGRVHRESIQRLVEKFNFPVALPLIYVVLKDHGSDYEVKNL LLEAASELDETSYNQERR        | 6.3e-16   |
| Thysanoptera     | <i>Thrips palmi</i>                  | GAXC01002564_6             | ENGRVHRESIQRLVEKFNFPVALPLIYVVLKDHGSDYEVKNL LLEAASELDQSGFNQERG        | 1.4e-14   |
| Thysanoptera     | <i>Gynaikothrips ficorum</i>         | GAXG01131335_3             | -NERVPWQSTMRL LQMFNF PENALPLIYVVLADHKADEKVMALLEDEGF*-----            | 3.1e-07   |
| Megaloptera      | <i>Sialis lutaria</i>                | GABK01005713_2             | HSLDVVLERCTRLTLDTRFMYPWEMMPLMYVILKYAGGNIDEA IRS IREGKRVVNEYSRIHNLN   | 8.4e-25   |
| Megaloptera      | <i>Corydalinae sp. KMRSBPM-2012</i>  | GADH01041729_2             | -NIELILECCHRLTLDTRFLYPWELMPLMYVILKYAGGNLDEA IRS IREGKRVVNEYSRTHNLN   | 2.1e-24   |
| Strepsiptera     | <i>Mengenilla moldrzyki</i>          | JP085896_4                 | NETERILDNSKLLLETFKFHSEMPLMYVILKDATDIRKATRIDEGWQVVNEYSIKNNLN          | 5.7e-22*  |
| Strepsiptera     | <i>Stylops melittae</i>              | GAZM01003845_3             | -----FXQKLMEIYKYPYEMMPLMYAILKSVNDFIEAQTRIDEGHQVVSDFLRKHNLN           | 3.0e-16   |
| Coleoptera       | <i>Meloe violaceus</i>               | GATA01002860_6             | RGAENLLEFCQRLKDKFQLSWKMSLVDVILKYAKEDQEAWRQIDEAFLEIRALAAVEAAR         | 2.3e-08   |
| Coleoptera       | <i>Meloe violaceus</i>               | GATA01002861_6             | RGAENLLEFCQRLKDKFQLSWKMSLVDVILKYAKEDQEAWRQIDEAFLEIRALAAVEAAR         | 2.4e-08   |
| Coleoptera       | <i>Dendroctonus ponderosae</i>       | GAFX01005311_3             | DRSMDLLEDCHKLEKFKHYPYEMMPLMYAILKDKARADLEASRRIDEGKQVVNEYSRTHNLN       | 1.9e-25   |
| Coleoptera       | <i>Onthophagus nigriventris</i>      | GAQW01004722_2             | IGQKDLIQESLQLEKFRYSWEMMPLIYAI VKDTPD-LEEASKRI DEGKDAEQLVDFLIK*-      | 3.1e-14   |
| Coleoptera       | <i>Onthophagus nigriventris</i>      | GAQW01004722_1             | *RR*TTSGFPNKIKDRFHL SWKMSL I HVILKNAKDDQEKAFRQIDEAFLEVQALAKYYPTP     | 5.9e-05   |
| Trichoptera      | <i>Hydroptila sp. AD2013</i>         | GAVM01009688_4             | ALMESILENCYILLERFNYSFEMMPLIYAILKATHIDIDEASRRIDEGQTFYLYVKDVMTAA       | 1.3e-19   |
| Trichoptera      | <i>Platycentropus radiatus</i>       | GASS01085500_2             | ASLETLHENCHKLEKFKHYSWEMMPLMYAILKDAHSDLEASRRIDEGKQVINEYARQNNLN        | 9.9e-29   |
| Lepidoptera      | <i>Dyseriocrania subpurpurella</i>   | GASY01001893_6             | TSLETLVENCQKLLKFKHFSWEMMPLVYAI VKHAQSNLDEASQRIEEALSTSIGHYERPLTT      | 2.2e-16   |
| Lepidoptera      | <i>Dyseriocrania subpurpurella</i>   | GASY01001894_6             | TSLETLVENCQKLLKFKHFSWEMMPLVYAI VKHAQSNLDEASQRIEEGYHFSHYHYHTLLRE      | 7.1e-18   |
| Lepidoptera      | <i>Polyommatus icarus</i>            | GAST01019581_4             | VSLESVLENCCHKLEKFKHYSWEMMPLVLVILNYAGSNIDEASRKIDEDVKHVVCHE-----       | 3.4e-19   |
| Lepidoptera      | <i>Yponomeuta evonymellus</i>        | GASG01061525_3             | -----LVENCNKLEKFKHYSWEMMPLVLVILNYAGSDLEASRKIDEGKMRVDEYARKHNLN        | 1.4e-22   |
| Lepidoptera      | <i>Empusa pennata</i>                | GAWT01314774_6             | ENIAVSRESILELDRFRLPWETLPLIYVVLDDARCDVNEASKRI LKGCYAKANDKVI VNAI      | 2.1e-17   |
| Siphonaptera     | <i>Ctenocephalides felis</i>         | GAYP01008256_1             | EKVAALLEESQI VEQ LKYPFEMLPFVYAILGLSGG-ISEAIKNIHNGQLVVSEYSRMMNLN      | 1.6e-15   |
| Mecoptera        | <i>Bittacus pilicornis</i>           | GATH01002938_5             | SEVNL LLDHCQKILEKFNYPFEMMPLIYAILK DAGD-IEASRRIDEGFLVYERLREETRIM      | 1.1e-20   |
| Mecoptera        | <i>Boreus hyemalis</i>               | GAYK01015512_3             | YSDKVVF DLSQKLEKFNYPFEMMPLIYANLKYAGS-IDE-----                        | 3.6e-10   |
| Mecoptera        | <i>Boreus hyemalis</i>               | GAYK01017535_4             | YFDKVVFDLSPKLLKFNCP IEMMPLIYANLRYADN-IDEASRRIEEDILRITYGRYHLVNL       | 7.4e-10   |
| Diptera          | <i>Bombylius major</i>               | GATI01007471_5             | QKAERLLEYCQKLEKFRYSWKMMPVYAILKDKARADVEASRRIDEAIRVVRPLTLHLRYP         | 2.0e-20   |
| Diptera          | <i>Bibio marci</i>                   | GATJ01028801_1             | --VDVLECS TKLEL FQYPWEMLPLMYVIVK DAGLNLEAVRRIVEANNDIRALYFWKAVR       | 1.8e-19   |
| Diptera          | <i>Bibio marci</i>                   | GATJ01051986_1             | LDDTAVVDHCQTILKRYDYPGEMLPLIYAI VQYCPN-LEEAIRRIDEGYRFYLLYTKLNSQV      | 3.7e-11   |

**Figure S5**

|                                |                                              |                                                                 |               |
|--------------------------------|----------------------------------------------|-----------------------------------------------------------------|---------------|
| <i>Atelura formicaria</i>      | GAYJ01004010*                                | ARERMLYESLVMMRQAFPVGEEAMPLLLCILKHSRS-VQEASLKIYQGHYDLNAKGFVGLDG  | Zygentoma     |
| <i>Thermobia domestica</i>     | GASN01031735*                                | ARERMLYESLLVMRQAFPVGEEAMALLLCILKHSRS-VQEASWKIYQGTYDLTSRGFVGLDN  | Zygentoma     |
| <i>Tricholepidion gertschi</i> | GASO01256612*                                | EREQMLYESLMVMRQAFPVGEEAMPLLLCILKHSRS-VQEASWKICQGTDRDLSARGIIGIEN | Zygentoma     |
| <i>Ephemera danica</i>         | GAUK01006643*                                | TREERMLYESLMQLRQLYPVPEASLPLLLCILKSSRS-IDEASAKIVQGTHELSTRGFPGIEA | Ephemeroptera |
| <i>Isonychia bicolor</i>       | GAXA01111429*                                | TREERMLYESLLELRQSFVPVPEAGLPLLLCILKSSRS-VHEASAKIVQGTHTDLSGLLGLDG | Ephemeroptera |
| <i>Baetis sp. AD-2013</i>      | GATU01002143*                                | QRKNLMYSSLLELRSHHPVPDAALPLLLCILNISNS-VKEASEKIQKGLQELSLAAASSNEL  | Ephemeroptera |
| <i>Atelura formicaria</i>      | FCD0KP1ACXX_7_2202_17946_4233_6 <sup>1</sup> | -----KESLQTLDMFRLPMETLPLIYVVLKDARSDVKEASNRIIEGGYWIMTQMAA-----   | Zygentoma     |
| <i>Thermobia domestica</i>     | GASN01345779                                 | ENVLLKDSLHALLDMFRLPLETLPLIYVVLKDARSDVKEASNRIIEAGVYQCMNQGIAPIG   | Zygentoma     |
| <i>Tricholepidion gertschi</i> | GASO01035827                                 | EEGDVMMESLHALLEMFQLPLETLPLIYVVLKDARSDVKEASNRIIEAQSELRSIF-----   | Zygentoma     |
| <i>Isonychia bicolor</i>       | GAXA01058460                                 | DNIDSLRDSIQTLDTFRLPMETLPLVYVVLKVSRSDVQEAFNRRISEGGYHMTSSDVPVAAA  | Ephemeroptera |

\* - high-confidence EST contig  
<sup>1</sup> - transcriptome sequencing read obtained from SRA accession SRR921568

**Figure S6**

>Sipyloidea\_sipylus\_contig22122  
CTGTCCC GCGGAAGAAGGGGAGGGCCCCGGCTTGGGGCTTGCTTGCCTGCCACTTACTTGCCTCGCGGGCGGGCAGTGAGTGCCGCGCGA  
ACAAGAGTGCGTCACAAAACACCCGGTTAACCTCAAATCAACAAAACACAGCTTTAGCCGCGCGCGCATGTGCGGACACCGACACCAGCAC  
GGACGCGACAGCCGCCGCCGCCCGCCCCACGTGCTCGTCATCGTCGGCGGGCGGTGGCCGCCAGCAGCTCGCAGAACCCGCGCACGCCGCC  
GAACTGCGCTCGTTGCCGCAACCACCGTCTCAAGATCGCCTTGAAAGGCCACAAGAGATACTGCAAATACCGCTACTGCACTTGCAGCAA  
GTGCCGGCTGACGGCGGAGCGACAACGCGTCATGGCGCTGCAGACGGCGTTGCGGGCGGGCACAAGCACAGGACGAGAGGTACCTGGCGCA  
GCAGGTGGCAGCCGTCACCGCCTCCGGCGTATCACCTCCACCGCCGCCGTTATCCTTGCATGCTGCTGCAGGTACGTGCTCGCCGCCGCC  
GCTGCAGCCTACGTGCTCGCCCCGCTCGCTCGGCCGACGGCAGCTGTGACTCGTCGTCATCGTCTCCGTGCTCGGCTAGGGTAATCTC  
CGTGCCGGCGCCTCGTAAAGCGATGGCACCCGTGCACCCACCTGACATCGCCGCCTCCACGGGGATGAGCGTGGATGCCATGATGGACGG  
AGTTTACACTTTATTGCACATGTTCCACTATCATGTGGAGATGCTGCCCTTACTATTGGTTCGTACTCAGTGACGCACACTGTGACGTCAC  
AGAAGCCTATAACCGCATCCTGCAGGAAACCCGGCCTCGGAAATTCGGGAATGCTAAGCTATGGTTGTCAGTATCATTCGTACGTGTTT  
CTGAAGTAGATATGGCGACTCCAACTGCTGATGAAGACTGTCATCGGCTGGGAACAACCTCAACTACGGACCAGATTGGCGCAGCTTCTA  
GAATGCCAAGGAAGAGGTGATAGCGATGGGGCGGGCGGGAGGCGGCGGATGATGCAGTACCATCCGGCGGGCGGGCGACCTACGGTGG  
CTGCTACGGATCCGCAGCGCCCGCATACTACCGGGGATGACCGCTAACGGGGCAATCTACCCACGCCGCCTCCAAGTCTCATGTTCTC  
ACCTCCTAGCGCCGCCGCC

>Lepismachilis\_y-signata\_contig\_383881  
CGACCCCGGCGCCTCCAGCTCAAGCTCGGCCGTGCCGCGTGCGCCGCCCAACTGCGCGCGCTGCCGCAACCACCGGCTCAAGGTCGAGCT  
GAAGGGTCACAAGCGCTACTGCAAGTACCGCTACTGCAACTGCGAGAAGTGCCGGCTGACGGCGGACCGGCAGCGTGTGATGGCGCTGCA  
GACGGCGCTGCGGGCGGGCGCAGGCGCAGGACGAGGCGCGCGCGCAACAACGGCCATCCGCCGCCGGGCGTGGAGCTGGAATGCCCGGA  
GCCGCCGGTGGTGAAGGCGCCGCGCAGCCCGGTGATCCCGCCGCGGTCCGTGGGCTCTACCAGCGGCGAGTCGGTGCCGGGGTCCGCCGT  
GGTGTCTCCGTACGCGGCGCCGCCGCCCTCTGCGCCGCCGCCAACCATGCCGCCGCTTCTCCCGCCACAACAGCCTGT

>Lepismachilis\_y-signata\_contig\_336923  
CCTTCATCTATCTTCCGTGACGCCTCATCCAGGTCGCTCCCCGCATAGTTGAGGATCACCAGGACTAAGGGCATCATCTCCAGGAGTAG  
TGGAACCTTCTCCAGGAGTTTGTGTCAGTTTTCAACCAGCGTCTCGAGGGATAACAGGCTGTTGTGGCGGGGGAAGCGGGGGCACGGGTGGG  
GGGGGGCAGAGGGCGGGGGGGCCGCGGACGGGGGCACCACCCGCG

## Supplementary Figure Captions

**Supplementary Figure S1.** High-confidence *doublesex* transcripts reported in this study. Highly conserved amino acid positions are in red text. The conserved Lysine residue characteristic of the *dsx* DM domain (OD1, see Results and Discussion) is highlighted in yellow. Deviations from the canonical Cys-His zinc finger motif are highlighted in blue. Also included are OD2-encoding singleton domains recovered for taxa that possessed a high-confidence EST, to illustrate evidence for putative *dsx* paralogy.

**Supplementary Figure S2.** All type-A OD1-encoding singletons recovered in our analyses. Highly conserved amino acid positions are in red text. The conserved Lysine residue characteristic of the Type-A *dsx* DM domain (OD1, see Results and Discussion) is highlighted in yellow. E-values were calculated against our profile HMM using HMMer v3.1; asterisks indicate e-value was calculated via NCBI Conserved Domain Database search.

**Supplementary Figure S3.** All type-B OD1-encoding singletons recovered in our analyses. Highly conserved amino acid positions are in red text. The conserved Isoleucine residue characteristic of the Type-B *dsx-like* DM domain (OD1, see Results and Discussion) is highlighted in yellow. E-values were calculated against our profile HMM using HMMer v3.1; asterisks indicate e-value was calculated via NCBI Conserved Domain Database search.



**Supplementary Figure S4.** All dimerization (OD2) domain-encoding singletons recovered in our analyses. Highly conserved amino acid positions are in red text. E-values were calculated against our profile HMM using HMMer v3.1; asterisks indicate e-value was calculated via NCBI Conserved Domain Database search.

**Supplementary Figure S5.** Alignment of both putative *doublesex* transcripts from each of the Zygentoma and Ephemeroptera species reported in this study. The high-confidence ESTs (black text) share similarity with each other, while the alternate motif (red text) segregates.

**Supplementary Figure S6.** De-novo assembled contigs referenced in this study.
